# Supplementary material
Source: PubMed Central journal article supplement (PMC2916989)
Supplement: tjp0588-2571-SD1.pdf [file tjp0588-2571-SD1.pdf]

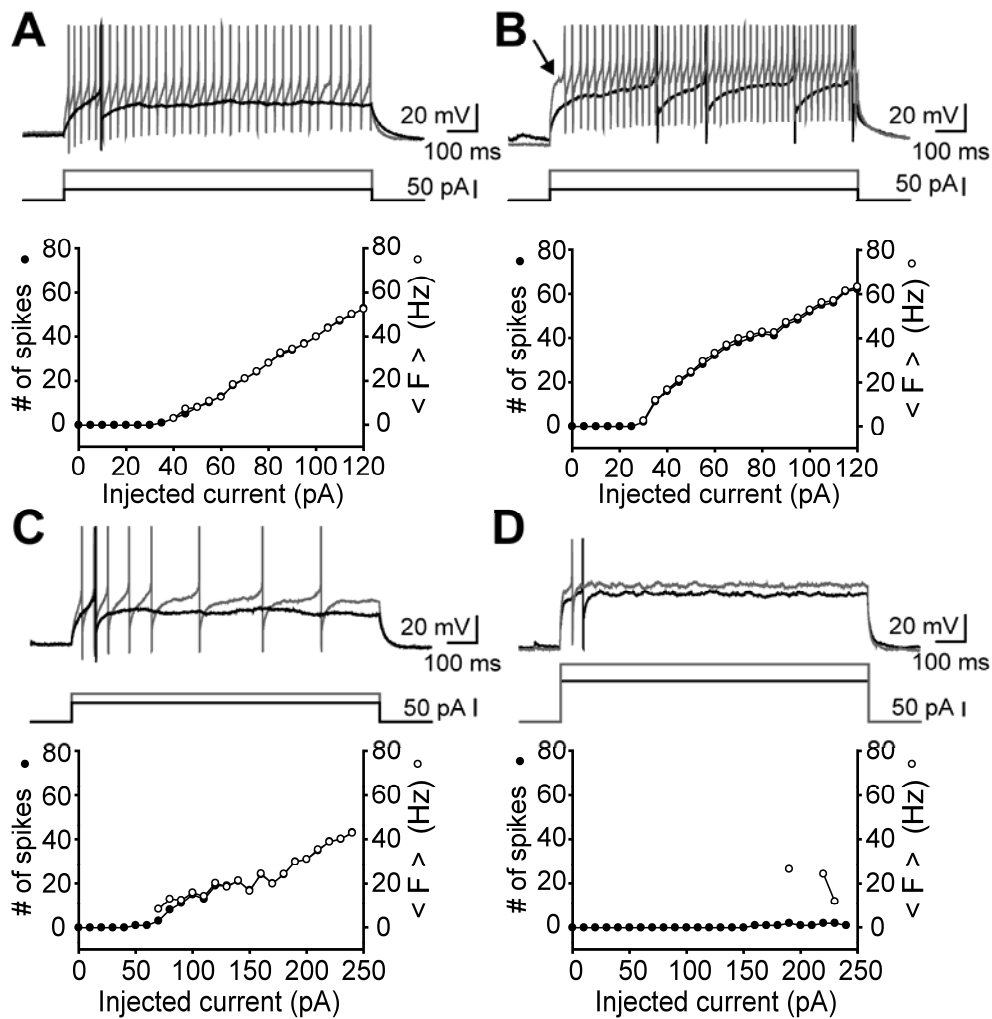

### Supplemental Figure 1

Four distinct firing patterns in dorsal horn EGFP+ neurons. (A-D) Top; Responses to depolarizing current steps. Middle; Injected current. Bottom, Output firing frequency and input current (F-I) relationship in neurons corresponding to top panels. Closed circles indicate the number of action potentials while open circles indicate the mean instantaneous frequency ( $\langle F \rangle$ ) in the current injection protocol (1 sec, 0 to 120 or 240 pA increment of 5 or 10 pA). (A) Tonic-firing neurons were characterized by linearly increased response over a wide range of stimulation intensities. (B) Delayed-firing neurons showed a delay (arrow) between the onset of the current pulse and the first action potential even after higher current injections. (C) Phasic-

firing neurons tended not to respond to mild stimulation with repetitive firing and instead showed an abrupt increase in frequency as the stimulus intensity was increased above rheobase.

(D) Single-spike neurons generated only one or a few action potentials at the beginning of the current pulse at just suprathreshold pulses.

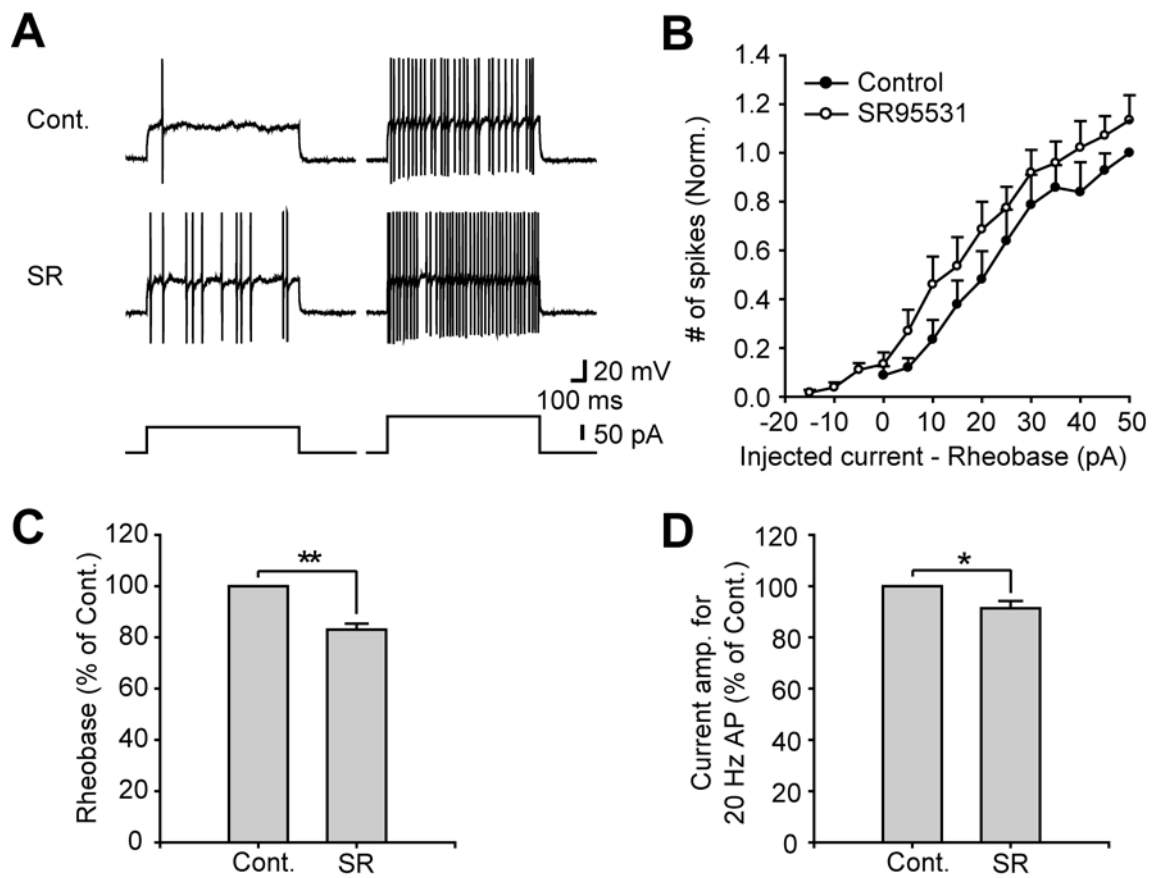

### Supplemental Figure 2

The effect of SR95531 on EGFP+ cell excitability. (A) Typical examples of action potentials induced by current injection (85 pA; left, 120 pA; right panel) under 2 conditions (Control; NBQX (10  $\mu$ M) and AP5 (50  $\mu$ M), SR; NBQX, AP5 and SR95531 (30  $\mu$ M)). Resting membrane potential was kept at -65 mV. Bottom traces show injected currents. (B) F-I relationship of EGFP+ neurons before and after application of SR (n = 6). (C) SR decreased the rheobase (n = 6). (D) SR decreased the current amplitude required for action potential firing at 20 Hz (n = 6). Data are shown as means  $\pm$  SEM. \* P < 0.05, \*\* P < 0.01.

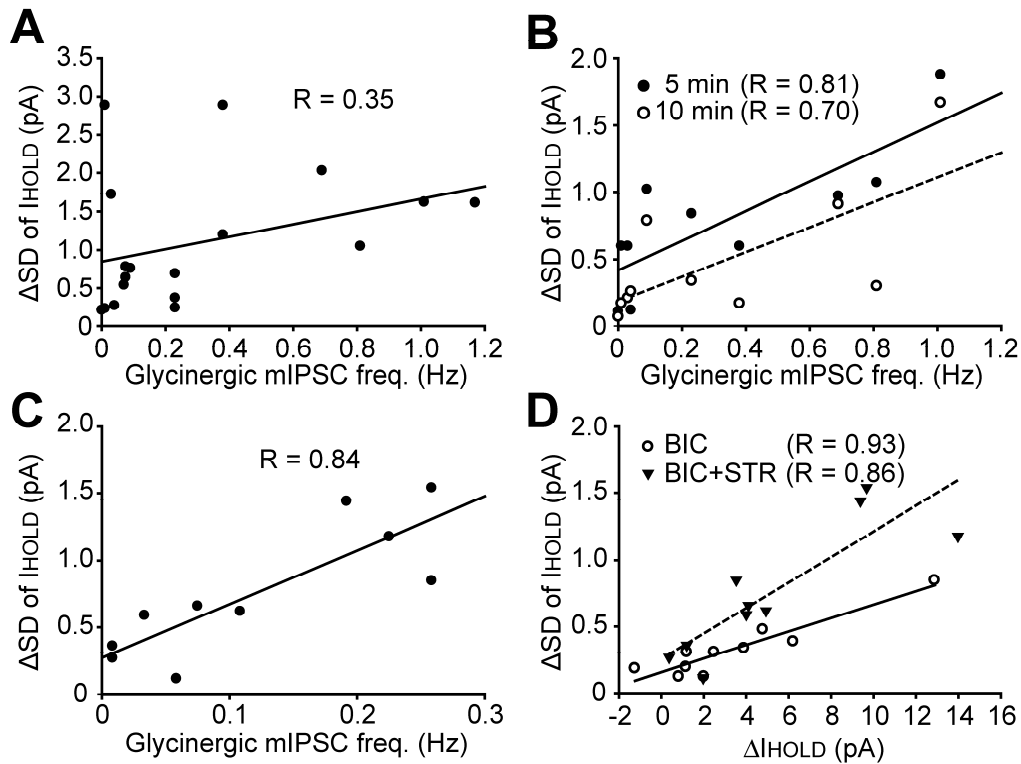

### Supplemental Figure 3

Standard deviation of holding current (SD of  $I_{HOLD}$ ) changed with pharmacological manipulation. (A) The change in SD of  $I_{HOLD}$  after application of strychnine was not correlated with the glycinergic mIPSC frequency at 3W ( $n = 18$ ). (B) The changes in SD of  $I_{HOLD}$  5 and 10 min after application of ORG were correlated with the glycinergic mIPSC frequency ( $n = 10$ , 5 min; filled circles and black line, 10 min, open circles and dotted line). (C) The change in SD of  $I_{HOLD}$  after application of strychnine was correlated with the glycinergic mIPSC frequency at 5W ( $n = 10$ ). (D) The decrease in  $I_{HOLD}$  and in SD of  $I_{HOLD}$  under BIC and BIC+STR conditions was correlated at 5W ( $n = 10$ , BIC; open circles and black line, BIC+STR; filled triangles and dotted line).

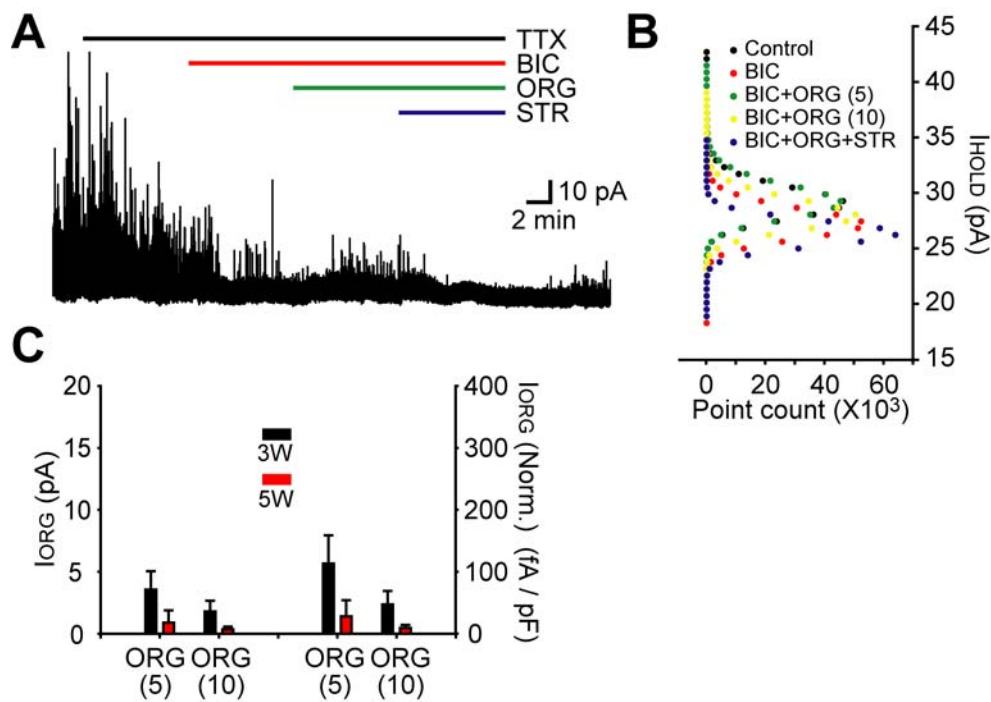

#### Supplemental Figure 4

Effect of glycine transporter 1 inhibitor, ORG 24598, in GABA d EGFP+ neurons obtained from 5W animals. (A) Baseline shift is shown as induced by bicuculline, followed by co-application with ORG 24598 (ORG; 10  $\mu\text{M}$ ) and finally ORG plus strychnine. Holding membrane potentials was 0 mV. (B) All-points histograms plot the amplitude of  $I_{\text{HOLD}}$  under different conditions (control; black circles, after application of bicuculline (BIC); red circles, 5 and 10 min after co-application of ORG (BIC+ORG (5) and (10)); green and yellow circles, after co-application of strychnine (BIC+ORG+STR); blue circles). (C) There was no difference in  $I_{\text{ORG}}$  (left columns) or  $I_{\text{ORG}}$  normalized by cell capacitance (right columns) between the neurons obtained from 3W ( $n = 6$ ) and 5W ( $n = 4$ ) animals. The scale was kept with the same as Figure 5G to facilitate comparison. Data are shown as means  $\pm$  SEM.

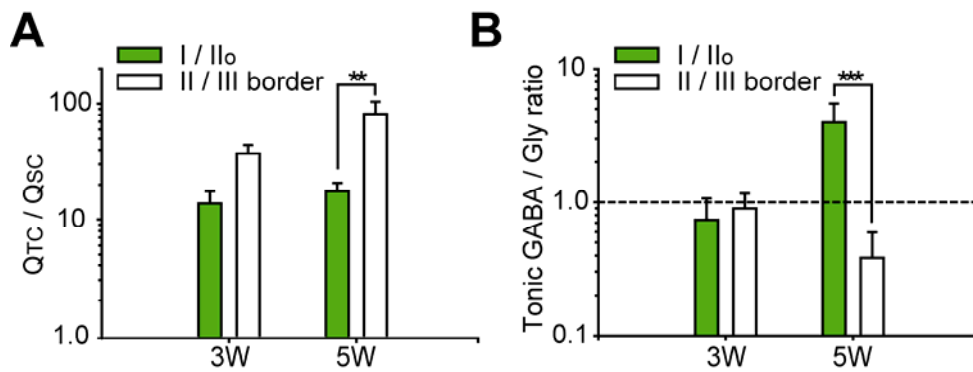

### Supplemental Figure 5

Synaptic and tonic charge transfer through glycine and GABA<sub>A</sub> receptors. (A) The ratio for inhibitory charge carried by total tonic and synaptic conductance ( $Q_{TC} / Q_{SC}$ ) was greater in Lamina II/III border neurons (3W; n = 9, 5W; n = 6, white bars) than in lamina I/Ilo neurons (3W; n = 9, 5W; n = 4, green bars) at 5W but not at 3W. (B) The ratios for negative charge transfer through tonic GABA<sub>A</sub>R- and GlyR-mediated conductance (tonic GABA/Gly ratio) in lamina I/Ilo and in lamina II/III border neurons were not different at 3W, but were different at 5W. Data are shown as means  $\pm$  SEM. \*\* P < 0.01, \*\*\* P < 0.001, two-way ANOVA with post hoc Bonferroni test.

### Supplemental Table 1

Passive and active membrane properties of EGFP+ dorsal horn neurons (3W) classified according to their firing patterns

|                                        | Tonic-firing<br>(T; n = 28) | Delayed-firing<br>(D; n = 17) | Phasic-firing<br>(P; n = 6) | Single-Spike<br>(SS; n = 4) | ANOVA (P) |
|----------------------------------------|-----------------------------|-------------------------------|-----------------------------|-----------------------------|-----------|
| Resting membrane potential (mV)        | -61 ± 1                     | -61 ± 2                       | -56 ± 3                     | -64 ± 4                     | 0.13      |
| Input resistance (MΩ)                  | 757 ± 63                    | 811 ± 64                      | 635 ± 64                    | 340 ± 59<br>* T & D         | 0.03      |
| Membrane capacitance (pF)              | 48 ± 3                      | 38 ± 4                        | 53 ± 4                      | 54 ± 4                      | 0.06      |
| Rheobase (pA)                          | 30 ± 2                      | 27 ± 3                        | 55 ± 9                      | 155 ± 50<br>*** All         | < 0.0001  |
| No. of action potentials at rheobase   | 2.1 ± 0.3                   | 1.9 ± 0.3                     | 1.0 ± 0.0                   | 1.0 ± 0.0                   | 0.21      |
| Delay at rheobase (msec)               | 217 ± 28                    | 473 ± 65<br>*** All           | 94 ± 18                     | 123 ± 63                    | < 0.0001  |
| CV of interspike intervals (%)         | 22 ± 3                      | 13 ± 3                        | 69 ± 10<br>*** T & D        | N/A                         | < 0.0001  |
| Half-width of action potentials (msec) | 0.51 ± 0.02                 | 0.45 ± 0.03                   | 0.49 ± 0.06                 | 0.41 ± 0.04                 | 0.12      |

CV; coefficient of variation

\* P < 0.05, \*\*\* P < 0.001, one-way ANOVA with post hoc Tukey test
